# Supplementary material for: Effect of algal species and light intensity on the performance of an air-lift-type microbial carbon capture cell with an algae-assisted cathode
Source: Royal Society of Chemistry journal article supplement (doi:10.1039/c5ra26299b), 2016-01-01
Supplement: c5ra26299b1.pdf [file c5ra26299b1.pdf]

## Appendices

### **Effect of algal species and light intensity on the performance of an air-lift-type microbial carbon capture cell with an algae-assisted cathode**

*Xia Hu, Jiti Zhou\*, Baojun Liu*

Key Laboratory of Industrial Ecology and Environmental Engineering, Ministry of Education, School of Environmental Science and Technology, Dalian University of Technology, Linggong Road 2, Dalian 116024, China.

\*Corresponding author. Prof. Jiti Zhou, E-mail: [jitizhou502@163.com](mailto:jitizhou502@163.com).

## 21 Calculations

### 22 Determination of CO<sub>2</sub> fixation rate

23 The CO<sub>2</sub> fixation rate  $R_{CO_2}$  (mg·L<sup>-1</sup>·d<sup>-1</sup>) was calculated as <sup>1</sup>:

$$24 \quad R_{CO_2} = C_c \times P \left( \frac{M_{CO_2}}{M_C} \right)$$

25 Where  $C_c$  is the carbon content in the biomass (% w/w), which was measured by  
26 elemental analyzer (Elementar vario EL III);  $P$  is the biomass productivity (mg·L<sup>-1</sup>·d<sup>-1</sup>)  
27 <sup>1</sup>);  $M_{CO_2}$  is the molar mass of CO<sub>2</sub>; and  $M_C$  is the molar mass of carbon.

28 The biomass productivity ( $P$ , mg·L<sup>-1</sup>·d<sup>-1</sup>) was calculated using the following  
29 equation:

$$30 \quad P = \frac{\Delta X}{\Delta t}$$

31 Where  $\Delta X$  is the variation of biomass concentration (mg·L<sup>-1</sup>) with cultivation  
32 time;  $\Delta t$  is the cultivation time (d).

33

34

35

36

37

38

39

40

41

42

43 Determination of lipid content and productivity

44 The band around 3000-2800 cm<sup>-1</sup> of FTIR spectroscopy could well characterize  
45 the lipid content changes and thus be used to detect quantitatively the lipid content  
46 and its accuracy has been validated by traditional methods.<sup>2 3</sup> For the determination of  
47 lipid content, egg phosphatidylcholine (egg-PC) was chose as an external standard.  
48 An infrared spectrometer (Bruker VERTEX 70, Germany) was used to record the  
49 characteristic peak areas of egg-PC at 2800-3000 cm<sup>-1</sup>, yielding the calibration  
50 equation:

51 
$$A = 32.598T + 1.9709 \ (R = 0.993).$$

52 Where  $A$  is the characteristic peak areas of lipid;  $T$  (mg) is the weight of lipid.

53 The lipid content  $L_c$  (%) was calculated by the following equation:

54 
$$L_c = \frac{T}{M} \times 100\%$$

55 Where  $T$  (mg) is the weight of lipid;  $M$  (mg) is the dry weight of microalgae.

56 The lipid productivity  $L_p$  (mg·L<sup>-1</sup>·d<sup>-1</sup>) was calculated by the following equation:

57 
$$L_p = P \times L_c$$

58 Where  $P$  (mg·L<sup>-1</sup>·d<sup>-1</sup>) is the biomass productivity;  $L_c$  (%) is the lipid content of  
59 microalgae.

60

61

62

63

64

65 A

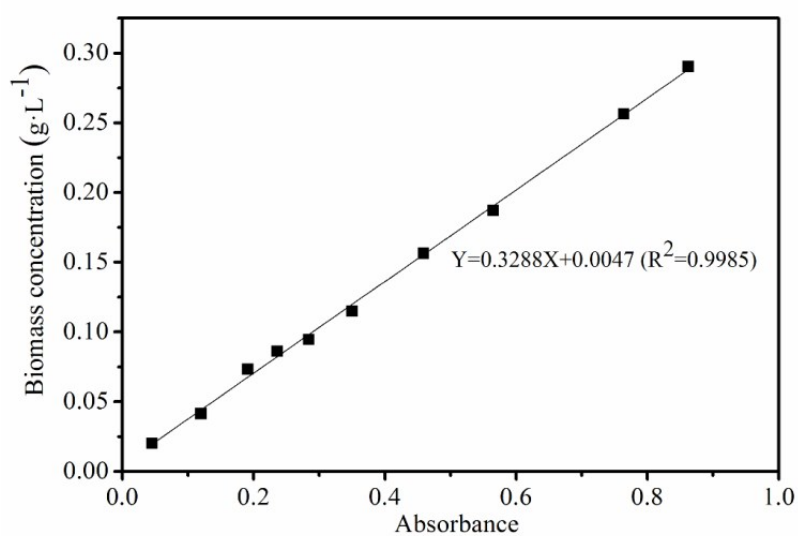

66

67 B

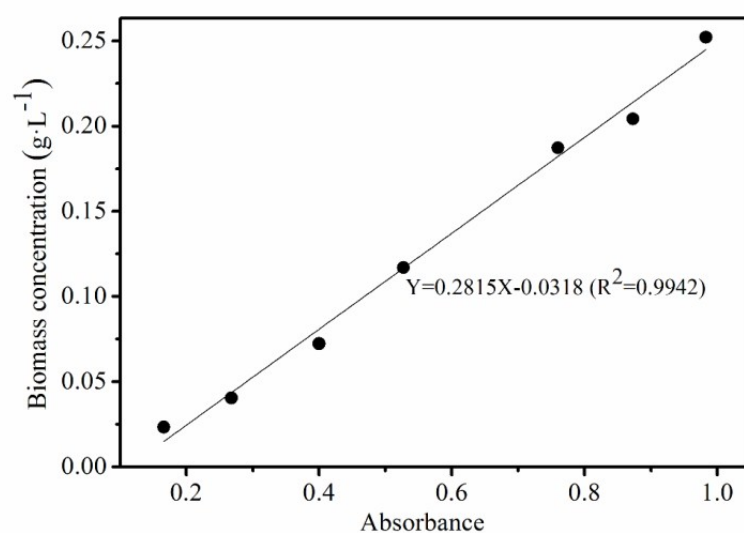

68

69 **Figure A.1.** The standard curves for biomass concentration of *Chlorella vulgaris* (A)

70 and *Chlorella* sp. (B) against calibration of absorbance (690 nm)

71

72

73

74

75

76 **Table A.1.** Power densities and lipid productivities in different reactors

| Reactor type | Microalgal species                   | Power densities (mW·m <sup>-2</sup> ) | Lipid productivities (mg·L <sup>-1</sup> ·d <sup>-1</sup> ) | References |
|--------------|--------------------------------------|---------------------------------------|-------------------------------------------------------------|------------|
| MCC          | <i>Chlorella vulgaris</i>            | 24.4                                  | NA                                                          | 4          |
| MCC          | <i>Chlorella vulgaris</i>            | 14.4                                  | NA                                                          | 5          |
| MCC          | <i>Chlorella</i> sp.                 | 3.35                                  | NA                                                          | 6          |
| MCC          | <i>Scenedismus obliquus</i>          | 30                                    | NA                                                          | 7          |
| MCC          | <i>Chlorella</i> + <i>Phormidium</i> | 2.7                                   | NA                                                          | 8          |
| ALMCC        | <i>Chlorella vulgaris</i>            | 116.71                                | 128.11                                                      | This study |
| ALP          | <i>Chlorella</i> sp.                 | NA                                    | 121                                                         | 9          |
| ALP          | <i>Chlorella vulgaris</i>            | NA                                    | 94-146                                                      | 10         |
| ALP          | <i>Chlorella sorokiniana</i>         | NA                                    | 68-85                                                       | 10         |
| ALP          | <i>Chlorella vulgaris</i>            | NA                                    | 98                                                          | 11         |
| ALP          | <i>Ankistrodesmus</i> sp.            | NA                                    | 112                                                         | 12         |

77

78

79 **References**

- 80 1. S. H. Ho, C. Y. Chen and J. S. Chang, Bioresour Technol., 2012, 113, 244-252.
- 81 2. Y. Meng, C. Yao, S. Xue and H. Yang, Bioresour Technol., 2014, 151, 347-
- 82 354.
- 83 3. A. M. Pistorius, W. J. DeGrip and T. A. Egorova-Zachernyuk, Biotechnol
- 84 Bioeng., 2009, 103, 123-129.
- 85 4. X. Y. Wu, T. S. Song, X. J. Zhu, P. Wei and C. C. Zhou, Appl Biochem
- 86 Biotech., 2013, 171, 2082-2092.
- 87 5. A. González del Campo, P. Cañizares, M. A. Rodrigo, F. J. Fernández and J.
- 88 Lobato, J Power Sources., 2013, 242, 638-645.
- 89 6. D. F. Juang, C. H. Lee and S. C. Hsueh, Bioresour Technol., 2012, 123, 23-29.
- 90 7. R. Kakarla and B. Min, Bioproc Biosyst Eng., 2014, 37, 2453-2461.
- 91 8. D. F. Juang, C. H. Lee, S. C. Hsueh and H. Y. Chou, Appl Biochem Biotech.,

92           2012, 167, 714-731.

93   9.       A. B. Fulke, S. N. Mudliar, R. Yadav, A. Shekh, N. Srinivasan, R. Ramanan,

94           K. Krishnamurthi, S. S. Devi and T. Chakrabarti, Bioresour Technol., 2010,

95           101, 8473-8476.

96   10.       C. Adams, V. Godfrey, B. Wahlen, L. Seefeldt and B. Bugbee, Bioresour

97           Technol., 2013, 131, 188-194.

98   11.       F. Han, J. Huang, Y. Li, W. Wang, J. Wang, J. Fan and G. Shen, Bioresour

99           Technol., 2012, 118, 431-437.

100   12.       M. Do Nascimento, L. Dublan Mde, J. C. Ortiz-Marquez and L. Curatti,

101           Bioresour Technol., 2013, 146, 400-407.

102
